# Supplementary material for: Single and Combined Effects of Phenanthrene and Silver Nanoparticles on Denitrification Processes in Coastal Marine Sediments
Source: MDPI journal article supplement (doi:10.3390/microorganisms12040745), 2024-04-06
Supplement: s1 [file s1]

**Table.S1** Quality control of data among different treatment groups

| Gene        | Sample | Raw PE | Effective Tags | AvgLen(nt) | Q20   | Q30   | GC%   | Effective% |
|-------------|--------|--------|----------------|------------|-------|-------|-------|------------|
| <i>nirS</i> | SC     | 90,179 | 82,940         | 370        | 98.48 | 86.77 | 61.86 | 91.97      |
|             | SP     | 84,316 | 78,044         | 370        | 98.48 | 86.78 | 62.28 | 92.56      |
|             | SA     | 88,275 | 81,545         | 370        | 98.52 | 86.86 | 62.41 | 92.38      |
|             | SJ     | 80,573 | 72,715         | 370        | 98.48 | 86.77 | 62.04 | 90.25      |
| <i>nosZ</i> | SC     | 98,065 | 95,066         | 223        | 99.07 | 88.05 | 57.13 | 96.94      |
|             | SP     | 95,780 | 91,944         | 224        | 99.17 | 88.23 | 56.87 | 96.00      |
|             | SA     | 90,576 | 88,041         | 223        | 99.18 | 88.25 | 57.24 | 97.20      |
|             | SJ     | 89,848 | 85,504         | 223        | 99.31 | 88.52 | 56.57 | 95.17      |

Note: Raw PE refers to the original off-machine PE reads; Effective Tags refer to Tags sequences that are finally used for subsequent analysis after filtering chimeras; AvgLen refers to the average length of Effective Tags; Q20 and Q30 refer to the percentage of bases in Effective Tags with base quality values greater than 20 (sequencing error rate less than 1%) and 30 (sequencing error rate less than 0.1%); GC (%) represents the content of GC bases in Effective Tags; Effective (%) represents the percentage of the number of Effective Tags to the number of Raw PE.
